# Supplementary material for: Biological functions of endophytic bacteria in Robinia pseudoacacia ‘Hongsen’
Source: Frontiers journal article supplement (doi:10.3389/fmicb.2023.1128727), 2023-08-09
Supplement: Image_1.pdf [file Image_1.pdf]

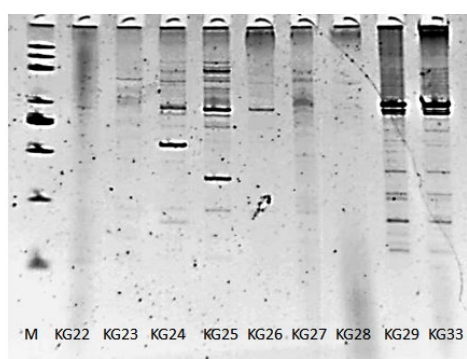

J3-7

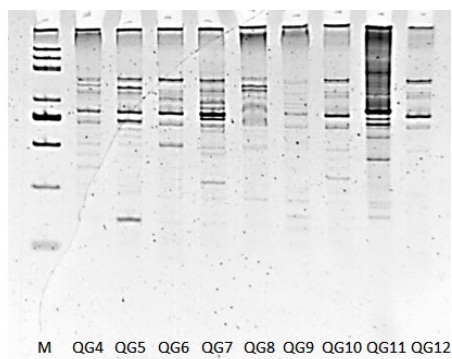

J3-13

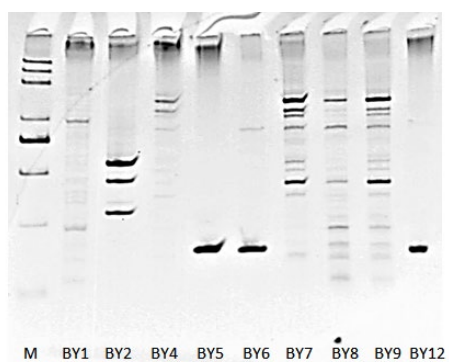

J3-20

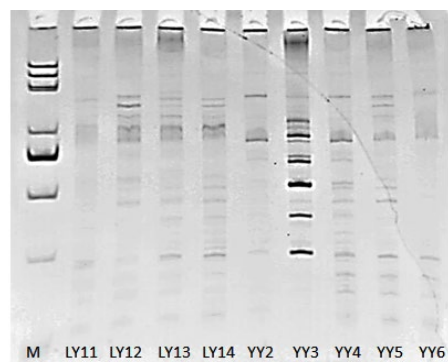

J3-21

SUPPLEMENT FIGURE 1 IS-PCR data showed representative gel results
